# Supplementary material for: Analysis of substrate specificity of human DHHC protein acyltransferases using a yeast expression system
Source: PubMed Central journal article supplement — Mol Biol Cell. 2012 Dec 1;23(23):4543–51. doi: 10.1091/mbc.E12-05-0336 (PMC3510016; doi:10.1091/mbc.e12-05-0336), 2012-12-01
Supplement: supp_E12-05-0336v1_Supplemental_Materials_E12-05-0336.pdf [file supp_E12-05-0336v1_Supplemental_Materials_E12-05-0336.pdf]

## **Supplemental Materials**

### **Analysis of substrate specificity of human DHHC protein acyltransferases using a yeast expression system**

**Yusuke Ohno, Atsushi Kashio, Ren Ogata, Akihiro Ishitomi, Yuki Yamazaki, and Akio Kihara**

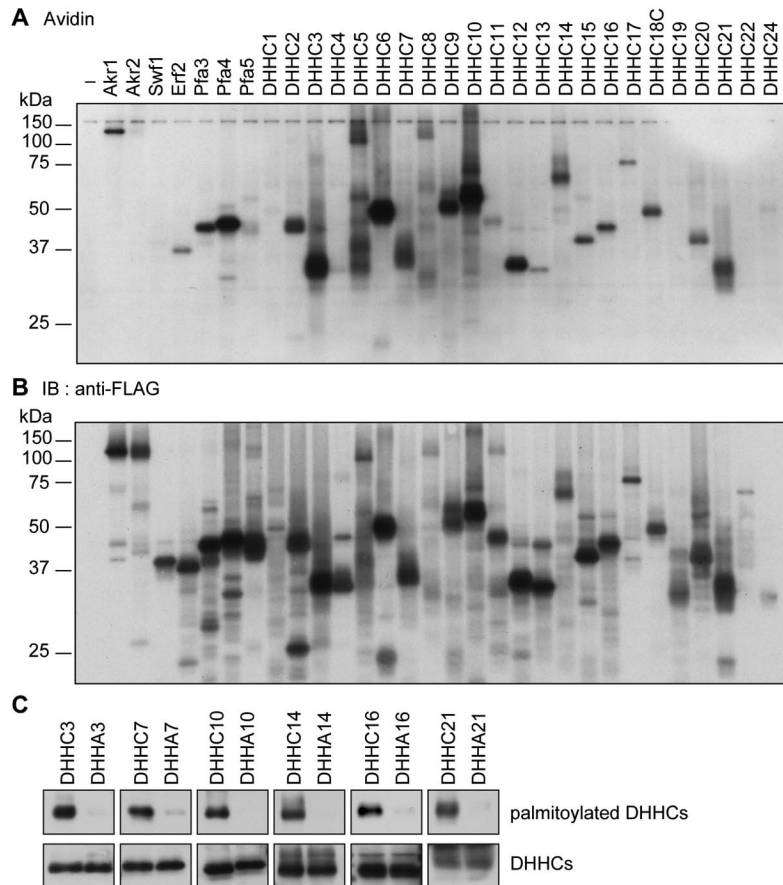

**Fig. S1.** Twenty human DHHC proteins form acyl intermediates in yeast. (A and B) SEY6210 (wild type) cells were transfected with the pAKNF314 (vector), pAKNF-AKR1 (*3xFLAG-AKR1*), pAKNF-AKR2 (*3xFLAG-AKR2*), pAKNF-SWF1 (*3xFLAG-SWF1*), pAKNF-ERF2 (*3xFLAG-ERF2*), pAKNF-PFA3 (*3xFLAG-PFA3*), pAKNF-PFA4 (*3xFLAG-PFA4*), pAKNF-PFA5 (*3xFLAG-PFA5*), pAKNF-DHHC<sub>x</sub> (*3xFLAG-DHHC<sub>x</sub>* with x representing the DHHC number; x=1-17, 19-22, and 24), or pLECF-DHHC18 (*DHHC18-3xFLAG*) plasmid. Total cell lysates were treated with *N*-ethylmaleimide (NEM) to block free Cys residues. After removal of palmitic acid from the palmitoylated Cys residues by incubation with hydroxylamine, the exposed free Cys residues were modified with biotin using Biotin-HPDP. The samples were then subjected to immunoprecipitation with anti-FLAG antibodies, followed by detection with streptavidin-HRP (A) or with immunoblotting using anti-FLAG antibody (B). (C) SEY6210 cells were transfected with pAKNF-DHHC<sub>x</sub> or pAKNF-DHHAx (x represents the DHHC number; x=3, 7, 10, 14, 16, and 21) plasmid. Total cell lysates were prepared and treated sequentially with NEM, hydroxylamine, and Biotin-HPDP. The biotinylated samples were precipitated with immobilized avidin beads and detected by immunoblotting with anti-FLAG antibody (upper panel). The DHHC proteins in the total lysates were also detected using immunoblotting with anti-FLAG antibody (lower panel).

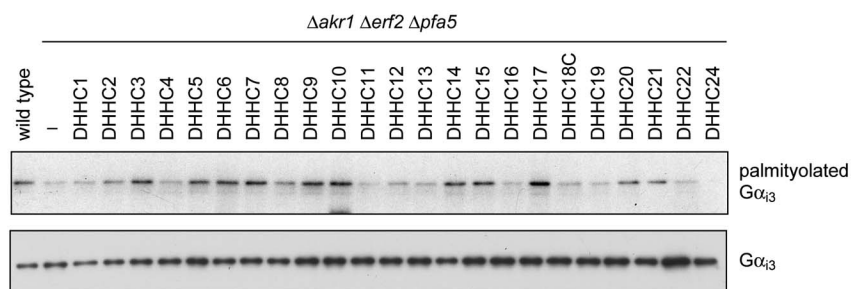

**Fig. S2.** Thirteen human DHHC proteins palmitoylate  $G\alpha_{i3}$ . The KAY251 ( $\Delta akr1 \Delta erf2 \Delta pfa5$ ) cells harboring the pYU- $G\alpha_{i3}$  ( $G\alpha_{i3}$ -9xMyc) plasmid were transfected with the pAKNF314 (vector), pAKNF-DHHCx ( $3xFLAG$ -DHHCx with x representing the DHHC number; x=1-17, 19-22, and 24), or pLECF-DHHC18 ( $DHHC18$ -3xFLAG) plasmid. Total cell lysates were prepared from the transfected cells, as well as wild type (SEY6210) cells bearing the pYU- $G\alpha_{i3}$  and pAKNF314 plasmids, and treated sequentially with NEM, hydroxylamine, and Biotin-HPDP. The DHHC proteins were immunoprecipitated with anti-Myc antibodies, and the precipitates were detected by Ultra Sensitive ABC Peroxidase Staining Kit (upper panel) or immunoblotting with anti-Myc antibody (lower panel).

**Table S1. Human and mouse *DHHC* genes**

| DHHC <sup>a</sup> |               | ZDHHC <sup>b</sup> |                | Other Name           | Accession Number |              |
|-------------------|---------------|--------------------|----------------|----------------------|------------------|--------------|
| Human             | Mouse         | Human              | Mouse          |                      | Human            | Mouse        |
| <i>DHHC1</i>      | <i>DHHC1</i>  | <i>ZDHHC1</i>      | <i>Zdhhc1</i>  |                      | NM_013304        | BC026570     |
| <i>DHHC2</i>      | <i>DHHC2</i>  | <i>ZDHHC2</i>      | <i>Zdhhc2</i>  | <i>REAM</i>          | BC050272         | NM_178395    |
| <i>DHHC3</i>      | <i>DHHC3</i>  | <i>ZDHHC3</i>      | <i>Zdhhc3</i>  | <i>GODZ</i>          | NM_016598        | NM_026917    |
| <i>DHHC4</i>      | <i>DHHC4</i>  | <i>ZDHHC4</i>      | <i>Zdhhc4</i>  |                      | NM_018106        | NM_028379    |
| <i>DHHC5</i>      | <i>DHHC5</i>  | <i>ZDHHC5</i>      | <i>Zdhhc5</i>  |                      | NM_015457        | NM_144887    |
| <i>DHHC6</i>      | <i>DHHC6</i>  | <i>ZDHHC6</i>      | <i>Zdhhc6</i>  |                      | BC007213         | NM_025883    |
| <i>DHHC7</i>      | <i>DHHC7</i>  | <i>ZDHHC7</i>      | <i>Zdhhc7</i>  | <i>SERZ-β</i>        | NM_017740        | NM_133967    |
| <i>DHHC8</i>      | <i>DHHC8</i>  | <i>ZDHHC8</i>      | <i>Zdhhc8</i>  |                      | NM_013373        | AY668947     |
| <i>DHHC9</i>      | <i>DHHC9</i>  | <i>ZDHHC9</i>      | <i>Zdhhc9</i>  |                      | BC012826         | AK032233     |
| <i>DHHC10</i>     | <i>DHHC10</i> | <i>ZDHHC11</i>     | <i>Zdhhc11</i> |                      | NM_024786        | AY668948     |
| <i>DHHC11</i>     | <i>DHHC11</i> | <i>ZDHHC23</i>     | <i>Zdhhc23</i> | <i>NIDD</i>          | NM_173570        | AY668949     |
| <i>DHHC12</i>     | <i>DHHC12</i> | <i>ZDHHC12</i>     | <i>Zdhhc12</i> |                      | NM_032799        | BC021432     |
| <i>DHHC13</i>     | <i>DHHC13</i> | <i>ZDHHC24</i>     | <i>Zdhhc24</i> |                      | NM_207340        | BC071194     |
| <i>DHHC14</i>     | <i>DHHC14</i> | <i>ZDHHC14</i>     | <i>Zdhhc14</i> |                      | NM_024630        | BC059814     |
| <i>DHHC15</i>     | <i>DHHC15</i> | <i>ZDHHC15</i>     | <i>Zdhhc15</i> |                      | BC103980         | NM_175358    |
| <i>DHHC16</i>     | <i>DHHC16</i> | <i>ZDHHC16</i>     | <i>Zdhhc16</i> | <i>APH2</i>          | NM_032327        | XM_129300    |
| <i>DHHC17</i>     | <i>DHHC17</i> | <i>ZDHHC17</i>     | <i>Zdhhc17</i> | <i>HIP14, AKR1</i>   | NM_015336        | NM_172554    |
| <i>DHHC18</i>     | <i>DHHC18</i> | <i>ZDHHC18</i>     | <i>Zdhhc18</i> |                      | NM_032283        | AY668950     |
| <i>DHHC19</i>     | <i>DHHC19</i> | <i>ZDHHC19</i>     | <i>Zdhhc19</i> |                      | NM_144637        | BC049761     |
| <i>DHHC20</i>     | <i>DHHC20</i> | <i>ZDHHC20</i>     | <i>Zdhhc20</i> |                      | NM_153251        | AY668951     |
| <i>DHHC21</i>     | <i>DHHC21</i> | <i>ZDHHC21</i>     | <i>Zdhhc21</i> |                      | NM_178566        | NM_026647    |
| <i>DHHC22</i>     | <i>DHHC22</i> | <i>ZDHHC13</i>     | <i>Zdhhc13</i> | <i>HIP14L, AKRL1</i> | AB024495         | NM_028031    |
| – <sup>c</sup>    | <i>DHHC23</i> | – <sup>c</sup>     | <i>Zdhhc25</i> |                      | –                | BC049767     |
| <i>DHHC24</i>     | <i>DHHC24</i> | <i>ZDHHC22</i>     | <i>Zdhhc22</i> |                      | NM_174976        | NM_001080943 |

<sup>a</sup>The *DHHC* nomenclature followed the previous report (Fukata *et al.*, 2004).

<sup>b</sup>The *DHHC* genes are registered in GenBank as *ZDHHC* (zinc-finger, *DHHC*-type). Note that nomenclatures of *DHHC* are different from those of *ZDHHC* for some *DHHC* genes.

<sup>c</sup>The *DHHC23* gene does not exist in human genome.

**Table S2. Yeast strains used in this study**

| Strain  | Genotype                                                                                                                                                                                                                                                                                                                                              | References                      |
|---------|-------------------------------------------------------------------------------------------------------------------------------------------------------------------------------------------------------------------------------------------------------------------------------------------------------------------------------------------------------|---------------------------------|
| SEY6210 | <i>MAT<math>\alpha</math> leu2-3,112 ura3-52 his3-<math>\Delta</math>200 trp1-<math>\Delta</math>901 lys2-801 suc2-<math>\Delta</math>9</i>                                                                                                                                                                                                           | (Robinson <i>et al.</i> , 1988) |
| SEY6211 | <i>MAT<math>\alpha</math> leu2-3,112 ura3-52 his3-<math>\Delta</math>200 trp1-<math>\Delta</math>901 ade2-101 suc2-<math>\Delta</math>9</i>                                                                                                                                                                                                           | (Robinson <i>et al.</i> , 1988) |
| KHY1028 | SEY6210, $\Delta$ <i>yck2::YCK2-K-RASB URA3</i>                                                                                                                                                                                                                                                                                                       | This study                      |
| KHY1031 | SEY6210, $\Delta$ <i>yck2::YCK2-K-RASB</i>                                                                                                                                                                                                                                                                                                            | This study                      |
| KHY1045 | SEY6210, $\Delta$ <i>akr1::HIS3</i>                                                                                                                                                                                                                                                                                                                   | This study                      |
| KHY1046 | SEY6210, $\Delta$ <i>yck2::YCK2-K-RASB <math>\Delta</math>akr1::HIS3</i>                                                                                                                                                                                                                                                                              | This study                      |
| RHY59   | <i>MAT<math>\alpha</math> leu2-3,112 ura3-52 his3-<math>\Delta</math>200 trp1-<math>\Delta</math>90 ade2-101 suc2-<math>\Delta</math>9<br/><math>\Delta</math><i>akr2::KanMX4 <math>\Delta</math>swf1::KanMX4 <math>\Delta</math>erf2::LEU2 <math>\Delta</math>pfa3::KanMX4<br/><math>\Delta</math>pfa4::LEU2 <math>\Delta</math>pfa5::KanMX4</i></i> | This study                      |
| IAY106  | RHY59, $\Delta$ <i>agp1::pTEF-9xMYC-AGP1 URA</i>                                                                                                                                                                                                                                                                                                      | This study                      |
| KAY39   | KHY1046, $\Delta$ <i>yck1::pTEF-9xMYC-YCK1 URA3</i>                                                                                                                                                                                                                                                                                                   | This study                      |
| KAY44   | SEY6210, $\Delta$ <i>agp1::pTEF-9xMYC-AGP1 URA3</i>                                                                                                                                                                                                                                                                                                   | This study                      |
| KAY47   | SEY6210, $\Delta$ <i>gpa2::pTEF-GPA2-9xMYC natNT2 URA3</i>                                                                                                                                                                                                                                                                                            | This study                      |
| KAY57   | KHY1046, $\Delta$ <i>erf2::KanMX4 <math>\Delta</math>gpa2::pTEF-GPA2-9xMYC natNT2<br/>URA3</i>                                                                                                                                                                                                                                                        | This study                      |
| KAY62   | SEY6210, $\Delta$ <i>yck1::pTEF-9xMYC-YCK1 URA3</i>                                                                                                                                                                                                                                                                                                   | This study                      |
| KAY110  | SEY6210, $\Delta$ <i>sso1::pTEF-9xMYC-SSO1 URA3</i>                                                                                                                                                                                                                                                                                                   | This study                      |
| KAY113  | SEY6210, $\Delta$ <i>swf1::KanMX4 <math>\Delta</math>sso1::pTEF-9xMYC-SSO1 URA3</i>                                                                                                                                                                                                                                                                   | This study                      |
| KAY251  | KHY1046, $\Delta$ <i>erf2::LEU2 <math>\Delta</math>pfa5::KanMX4</i>                                                                                                                                                                                                                                                                                   | This study                      |

**Table S3. Primers used in this study**

| Primer    | Nucleotide sequence                                                                                |
|-----------|----------------------------------------------------------------------------------------------------|
| DHHC18C-F | 5'-AGAATTCGCCACCATGAAGGACTGCGAG-3' ( <i>EcoRI</i> )                                                |
| DHHC18C-R | 5'-AAGATCTTCCACCATGCTGGCATCAGG-3' ( <i>BglIII</i> )                                                |
| DHHC24-F  | 5'-AAGGATCCATGCTGGCCCTGCGGCTGCTCAACG-3' ( <i>BamHI</i> )                                           |
| DHHC24-R  | 5'-TGGATCCCTACTTATCCTGCTGCTTGGAGC-3' ( <i>BamHI</i> )                                              |
| PSD95-F   | 5'-AGCCACCATGGACTGTCTCTGTATAGTGACAAC-3'                                                            |
| PSD95-R   | 5'-TGAATTCGAGAGTCTCTCTCGGGCTGGAACC-3'                                                              |
| SNAP25b-F | 5'-TGGATCCATGGCCGAAGACGCAGACATGC-3' ( <i>BamHI</i> )                                               |
| SNAP25b-R | 5'-TTTAACCACTTCCCAGCATCTTTGTTGC-3'                                                                 |
| Gαi3-F    | 5'-GCCACCATGGGCTGCACGTTGAGCGCCGAG-3'                                                               |
| Gαi3-R    | 5'-AACCCGGGCAAATAAAGCCCACATTCC-3' ( <i>SmaI</i> )                                                  |
| AKR1-F    | 5'-AGGATCCATGGTGAACGAATTAGAGAATG-3' ( <i>BamHI</i> )                                               |
| AKR1-R    | 5'-ACCTCATGAGCTCTCCTAATAGTCC-3'                                                                    |
| AKR2-F    | 5'-AAGATCTATGACCAGTATGTCAATTATTG-3' ( <i>BglIII</i> )                                              |
| AKR2-R    | 5'-AATCACGCAAATTTTTGTTGTGCAC-3'                                                                    |
| ERF2-F    | 5'-GGATCCATGGCCTTGGTCTCTAGAAGGTTCG-3' ( <i>BamHI</i> )                                             |
| ERF2-R    | 5'-GCTGCACGTTGTCTGACATCTGAAGH-3'                                                                   |
| SWF1-F    | 5'-GGATCCATGTCATGGAATCTACTATTTGTGC-3' ( <i>BamHI</i> )                                             |
| SWF1-R    | 5'-CAGGACTAATTGCTGGTAGTATGGA-3'                                                                    |
| PFA3-F    | 5'-GGATCCATGAATGACAGGCTTTCGTTGACAAG-3' ( <i>BamHI</i> )                                            |
| PFA3-R    | 5'-TGGCTACAGTACCACAGTAGATTCT-3'                                                                    |
| PFA4-F    | 5'-GGATCCATGCCAGTAAAGTTAAGGTGGCCTT-3' ( <i>BamHI</i> )                                             |
| PFA4-R    | 5'-CGAGTGCTGGAAACCAGGGAATAGA-3'                                                                    |
| PFA5-F    | 5'-GGATCCATGGCTCTATCATGGAATATTCGAA-3' ( <i>BamHI</i> )                                             |
| PFA5-R    | 5'-GTGAAGATTGGAGACGTTGCCTCAC-3'                                                                    |
| YCK2-F1   | 5'-GGAAACTACCAGAATACACAACGCC-3'                                                                    |
| YCK2-R1   | 5'-CAATTGCCCGGGTTACATAATTACACACTTTGTCTTTGACTTCTTTTTCT<br>TCTTTTTACCATCTCCTAGCTTACTGAAAAACCTTTCG-3' |
| YCK2-F2   | 5'-AATAGAAAACGGAGGAGGTTTTTTG-3'                                                                    |
| YCK2-R2   | 5'-CTATTTGTCTATCCAGCTAAACGTG-3'                                                                    |
| YCK1-F    | 5'-CATACAAAAATTCGCGCATTTCGCTGGCCCTTTTCCCTGCTCTCCTCTTCC<br>CCATGGCCAAGCTTTTCAATTCATC-3'             |
| YCK1-R    | 5'-TTATATTGGTGAGGTTGTTAACTGCTAGAGTGGTACTTGCTATGGGCAT<br>GGACATAGATCTGCTAG-3'                       |
| GPA2-F1   | 5'-CGCCATCAAAGAAACAATTTGGAAAATACATTGAAAGACTCTGGAGT<br>GTTACAACGTACGCTGCAGGTCGACTC-3'               |
| GPA2-R1   | 5'-ATAATAAAGGGGAGAAGAGGCATGCAGTTTTGTCTCTGTTTTAGCTGT<br>GCATTCACATCGATGAATTCGAGCTCG-3'              |

GPA2-F2 5'-CAGCGAGCCTTATTGTTACAGCACAAATCACGCGTATTTTCAAGCAAA  
TATCATGGCCAAGCTTTTCAATTCATC-3'

GPA2-R2 5'-CGGTCTGCGTGTGTCAGGAGTGCTGCCGTTCTTTTCTGAAGATGCGCAGAG  
ACCCATTCCACTAGAAAAGTTAG-3'

AGP1-F 5'-TGTAATCTTTATAGAAGAAGCACGCTAATATAGACAAAGATAGCTTCG  
CACAATGGCCAAGCTTTTCAATTCATC-3'

AGP1-R 5'-CTGTGGAGCTATTTTCAAGTCTTTCAGTTCGTATAGAGACTTCGACGA  
CGACATAGATCTGCTAGTGGATCCG-3'

SSO1-F1 5'-AAGAAAACCCTTTTACAATTAATAAAGGCAATTAATAAATAGAAACAA  
ATCAAATGGCCAAGCTTTTCAATTCATC-3'

SSO1-R1 5'-CCAACTCGTATGACTCTTCAAAGGGTTTCCAACTGGTACGGATTATT  
ATAACTAGATCTGCTAGTGGATCCG-3'

---

### **Supplemental References**

Fukata M, Fukata Y, Adesnik H, Nicoll RA, Brecht DS (2004). Identification of PSD-95 palmitoylating enzymes. *Neuron* 44, 987-996.

Robinson JS, Klionsky DJ, Banta LM, Emr SD (1988). Protein sorting in *Saccharomyces cerevisiae*: isolation of mutants defective in the delivery and processing of multiple vacuolar hydrolases. *Mol Cell Biol* 8, 4936-4948.
